# Supplementary material for: An Eco-Friendly Adsorbent Based on Bacterial Cellulose and Vermiculite Composite for Efficient Removal of Methylene Blue and Sulfanilamide
Source: MDPI journal article supplement (doi:10.3390/polym15102342), 2023-05-17
Supplement: s1 [file s1]

*Supplementary Information*

# **An Eco-Friendly Adsorbent Based on Bacterial Cellulose and Vermiculite Composite for Efficient Removal of Methylene Blue and Sulfanilamide**

**Xiuzhi Bai <sup>1</sup>, Zhongxiang Liu <sup>1</sup>, Pengfei Liu <sup>1,2,\*</sup>, Yijun Zhang <sup>1</sup>, Linfeng Hu <sup>1,3</sup> and Tongchao Su <sup>4</sup>**

<sup>1</sup> School of Chemistry and Chemical Engineering, Henan Institute of Science and Technology, Xinxiang 453003, China; amibai@126.com (X.B.); liuzhongxiang0903@126.com (Z.L.); zhangyijun@hist.edu.cn (Y.Z.)

<sup>2</sup> School of Chemistry and Chemical Engineering, Hunan University of Science and Technology, Xiangtan 411201, China

<sup>3</sup> Experiment and Test Center, Henan Institute of Science and Technology, Xinxiang 453003, China

<sup>4</sup> School of Food Science, Henan Institute of Science and Technology, Xinxiang 453003, China; sutongchao66@163.com

\* Correspondence: lpf8856@163.com

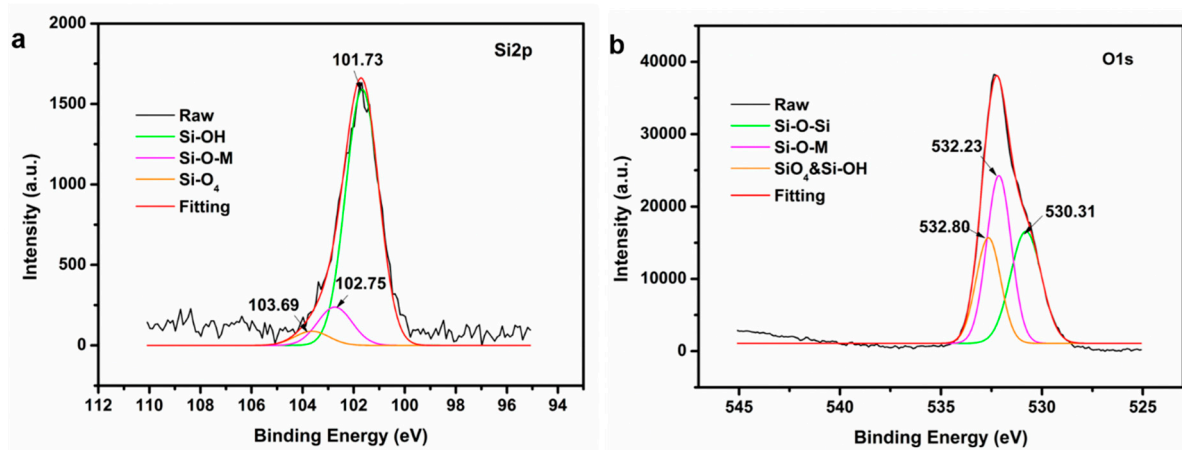

**Figure S1.** The high-resolution XPS spectra of Si2p (a) and O1s (b).

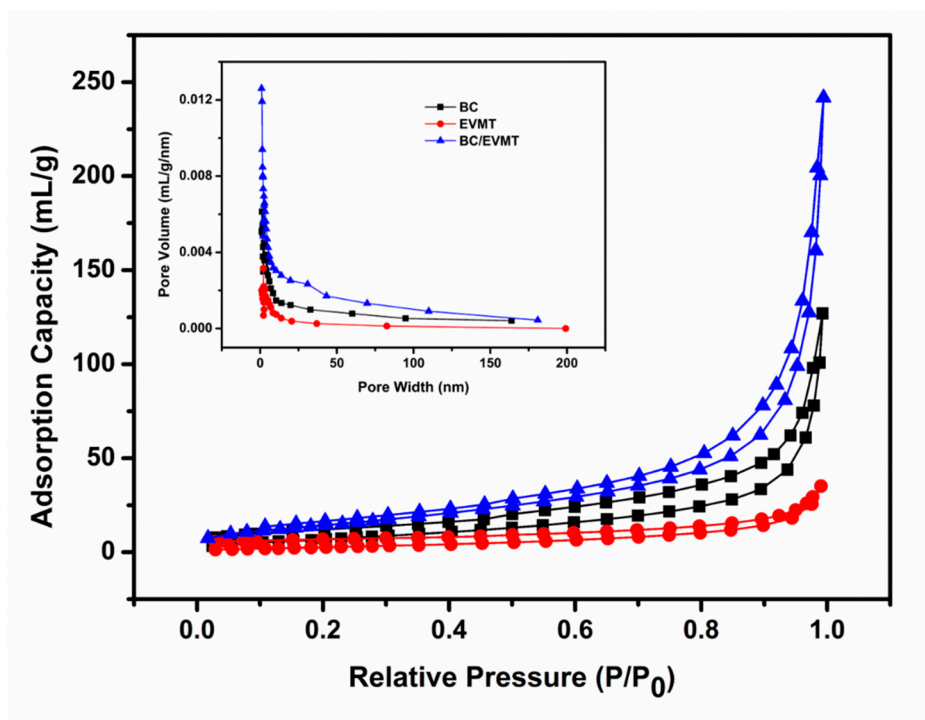

**Figure S2.** The nitrogen adsorption-desorption isotherms of EVMT, BC, and BC/EVMT by Brunauer-Emmett-Teller (BET) method.

**Table S1.** BET data of EVMT, BC, and BC/EVMT.

| Samples | BET surface                       | BJH Adsorption              | Adsorption      |
|---------|-----------------------------------|-----------------------------|-----------------|
|         | area                              | cumulative volume of        | average         |
|         | (m <sup>2</sup> g <sup>-1</sup> ) | pores (mL g <sup>-1</sup> ) | pore width (nm) |
| BC      | 28.67                             | 0.1964                      | 12.47           |
| EVMT    | 11.50                             | 0.0543                      | 10.43           |

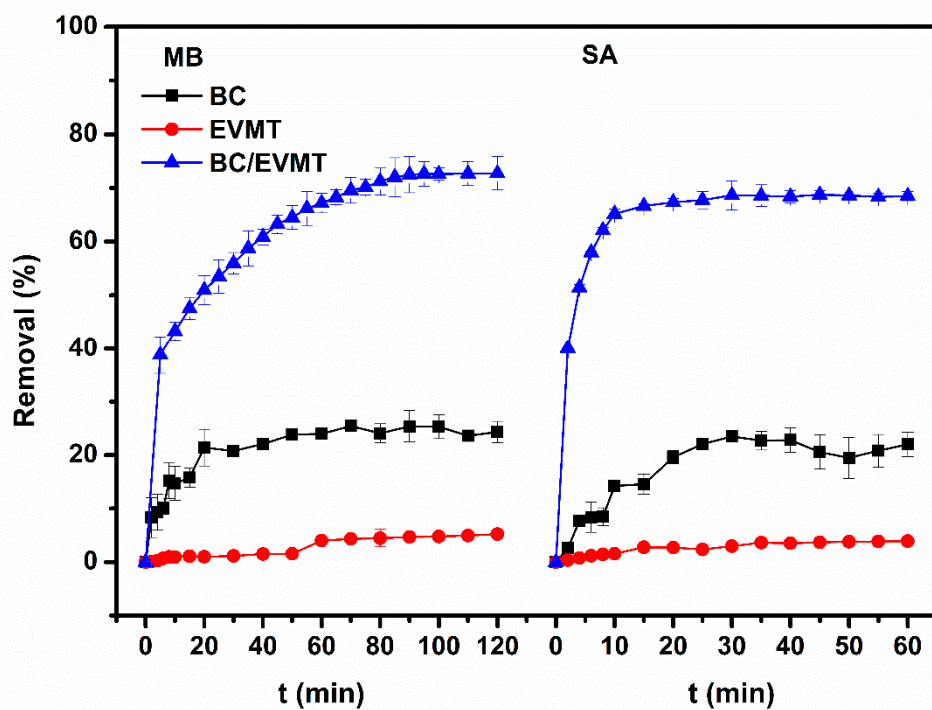

**Figure S3.** Removal efficiency of BC, EVMT, and BC/EVMT for MB and SA (temperature: 30 °C,  $\text{pH}_{\text{MB}}$ : 8,  $\text{pH}_{\text{SA}}$ : 2, adsorbent

dosage: 20 mg,  $[\text{MB}]_0$ : 60 mg/L,  $[\text{SA}]_0$ : 60 mg/L).

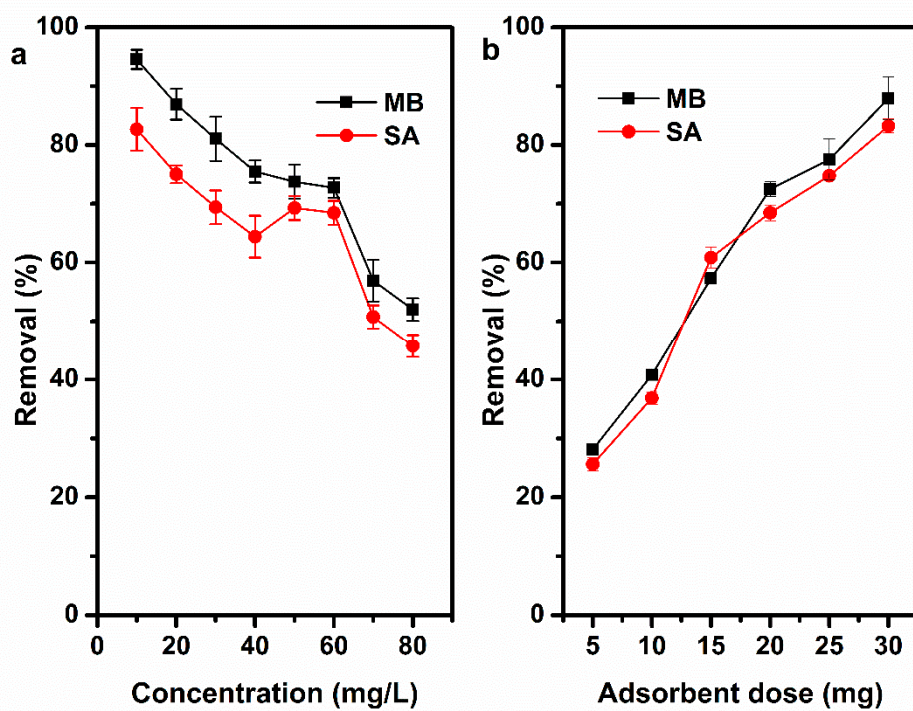

**Figure S4.** Effect of various experimental parameters on the adsorption of MB and SA by BC/EVMT: (a) MB and SA concentration and (b) adsorbent dosage. (temperature: 30 °C,  $\text{pH}_{\text{MB}}$ : 8,  $\text{pH}_{\text{SA}}$ : 2, adsorbent dosage: 20 mg,  $[\text{MB}]_0$ : 60 mg/L,  $[\text{SA}]_0$ : 60 mg/L,  $t$ : 120 min).
